# Supplementary material for: Graphite-like carbon nitride quantum dot (CNQD)-modified Bi2MoO6 heterostructure with high visible-light photocatalytic activity
Source: Royal Society of Chemistry journal article supplement (doi:10.1039/c8nj03740j), 2018-11-13
Supplement: c8nj03740j1.pdf [file c8nj03740j1.pdf]

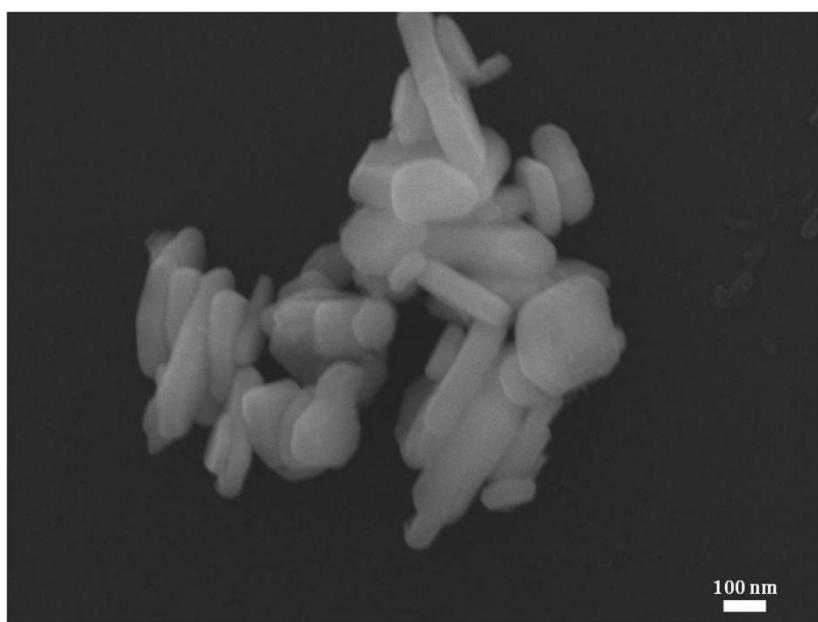

**Fig. S1 SEM images of the as-prepared CNQDs/Bi<sub>2</sub>MoO<sub>6</sub> sample after photocatalysis.**

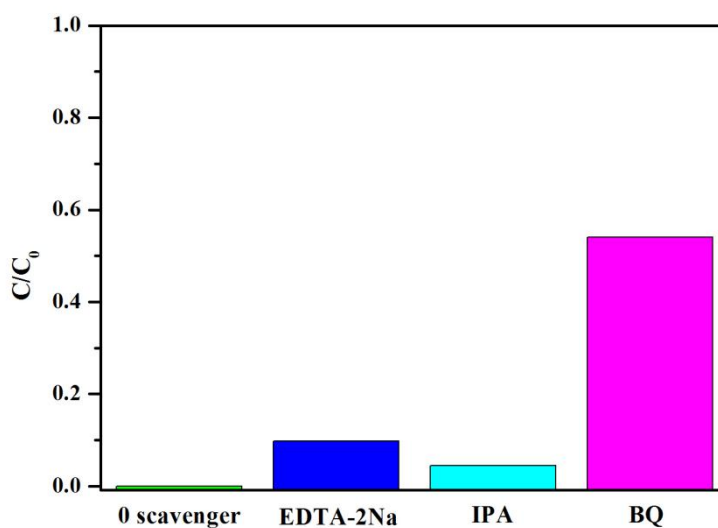

**Fig. S2 Trapping experiments of active species during the photocatalytic degradation of Rh B over CNQDs/Bi<sub>2</sub>MoO<sub>6</sub> sample under visible light irradiation.**

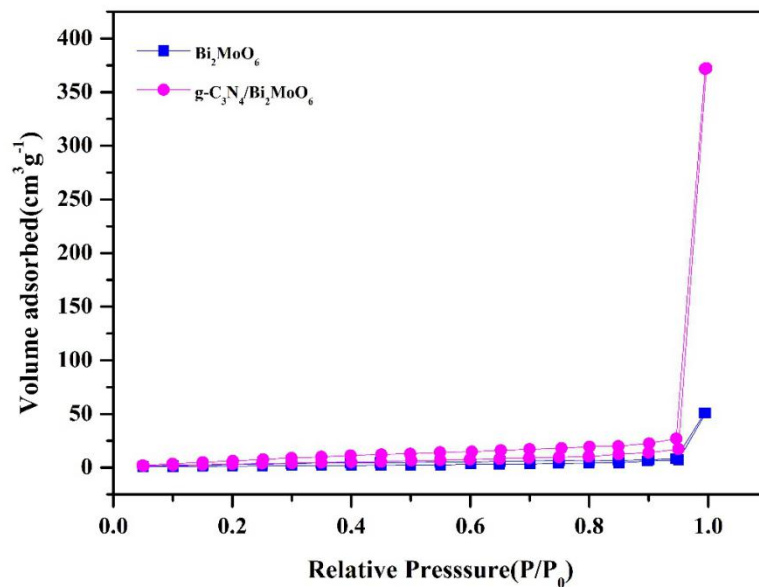

Fig. S3 N<sub>2</sub> adsorption-desorption isotherm curves of the as-prepared samples.

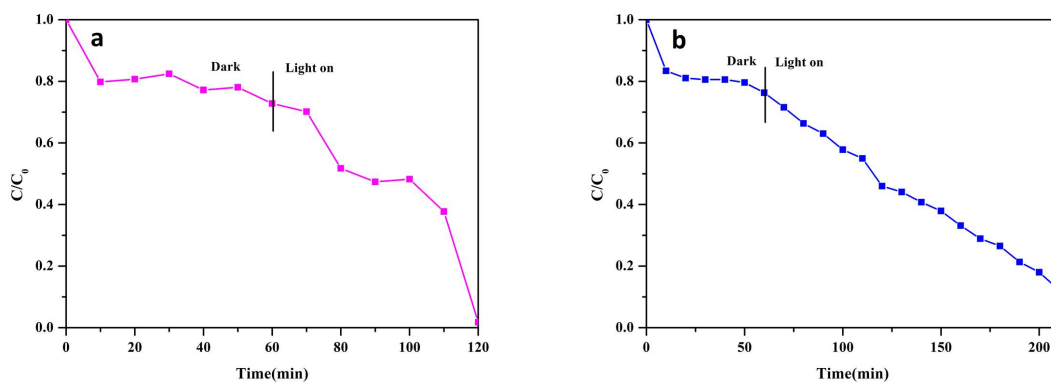

Fig. S4 Photodegradation efficiencies of bisphenol A (a) and tetracycline (b) as a function of irradiation time for 5% CNQDs/Bi<sub>2</sub>MoO<sub>6</sub> photocatalyst.
